# Supplementary material for: Depression and Type 2 Diabetes Over the Lifespan
Source: Oxford University Press journal article supplement (doi:10.2337/dc08-0985), 2008-11-25
Supplement: dc080985-sup-supplemental_search_results_81_4_08.doc [file dc080985-sup-supplemental_search_results_81_4_08.doc]

**Supplemental Search Results for on-line publication**

As described in the Results section and illustrated by Supplemental Figure 1, the following 24 manuscripts were retrieved for full-text abstraction from the search but did not meet inclusion criteria for the meta-analysis.

*Failed to remove prevalent cases of depression at baseline*

Naqvi T, Rafique A, Andreas V, Rahban M, Mirocha J, Naqvi S: Predictors of depressive symptoms post-acute coronary syndrome. *Gend Med* 4:339-351, 2007.

Lustman P, Griffith L, Clouse R: Depression in adults with diabetes: results of a 5-year follow-up study. *Diabetes Care* 11:605-612, 1988.

Nichols G, Brown J: Functional status before and after diagnosis of type 2 diabetes. *Diabet Med* 21:793-797, 2004.

Bisschop M, Kriegsman D, Deeg D, Beekman A, van Tilburg W: The longitudinal relation between chronic diseases and depression in older persons in the community: the Longitudinal Aging Study Amsterdam. *J Clin Epidemiol* 57:187-194, 2004.

Schnittker J: Chronic illness and depressive symptoms in late life. *Soc Sci Med* 60:13-23, 2005.

Khamesh M, Baradaran H, Rajabali H: Depression and diabetse in Iranian patients: a comparative study. *Int J Psychiatry Med* 37:81-86, 2007.

Whyte E, Mulsant B, Vanderbilt J, Dodge H, Ganguli M: Depression after stroke: a prospective epidemiological study. *J Am Geriatr Soc* 52:774-778, 2004.

Almeida O, Norman P, Hankey G, Jamrozik K, Flicker L: Successful mental health aging: results from a longitudinal study of older Australian men. *Am J Geriatr Psychiatry* 14:27-35, 2006.

Antsey K, von Sanden C, Sargent-Cox K, Luszcz M: Prevalence and risk factors for depression in a longitudinal, population-based study including individuals in the community and residential care. *Am J Geriatr Psychiatry* 15:497-505, 2007.

*Failed to remove prevalent cases of diabetes at baseline*

Knox S, Barnes A, Kiefe C, Lewis C, Iribarren C, Matthews K, Wong N, Whooley M: History of depression, race, and cardiovascular risk in CARDIA. *Int J Behav Med* 13:44-50, 2006.

*Used a measure of “burnout” rather than depression*

Melamed S, Shirom A, Toker S, Shapira I: Burnout and risk of type 2 diabetes: A prospective study of apparently healthy employed persons. *Psychosom Med* 68:863-869, 2006.

*Did not provide enough data to generate a relative risk estimate*

Murphy J, Monson R, Oliver M, Zahner G, Sobol A, Leighton A: Relations over time between psychiatric and somatic disorders: the Stirling County Study. *Am J Epidemiol* 136:95-105, 1992.

Honkonen T, Ahola K, Pertovaara M, Isometa E, Kalimo R, Nykyri E, Aromaa A, Lonnqvist J: The association between burnout and physical illness in the general population - results from the Finnish Health 2000 Study. *J Psychosom Res* 61:59-66, 2006.

Geerlings S, Beekman A, Deeg D, van Tilberg W: Physical health and the onset and persistence of depression in older adults: an eight-wave prospective community-based study. *Psychol Med* 30:369-380, 2000.

Lidfeldt J, Samsioe G, Nerbrand C, Agardh C-D: Women living along have an increased risk to develop diabetes, which is explained mainly by lifestyle factors. *Diabetes Care* 28:2531-2536, 2005.

Goldberg E, Comstock G, Hornstra R: Depressed mood and subsequent physical illness. *Am J Psychiatry* 136:530-534, 1979.

Kessing L, Nilsson F, Siersma V, Anderson P: No increased risk of developing depression in diabetes compared to other chronic illness. *Diabetes Res Clin Pract* 62:113-121, 2003.

Karpansalo M, Kauhanen J, Lakka T, Manninen P, Kaplan G, Salonen J: Depression and early retirement: prospective population-based study in middle aged men. *J Epidemiol Community Health* 59:70-74, 2005.

Gangwisch J, Heymsfield S, Boden-Albala B, Buijs R, Kreier F, Pickering T, Rundle A, Zammit G, Malaspina D: Sleep duration as a risk factor for diabetes incidence in a large US sample. *Sleep* 30:1667-1673, 2007.

Ayas N, White D, Al-Delaimy W, Manson J, Stampfer M, Speizer F, Patel S, Hu F: A prospective study of self-reported sleep duration and incident diabetes in women. *Diabetes Care* 26:380-384, 2003.

Bjerkeset O, Nordahl H, Mykletun A, Holmen J, Dahl A: Anxiety and depression following myocardial infarction: gender differences in a 5-year prospective study. *J Psychosom Res* 58:153-161, 2005.

*Utilized the same study population as a more recent report (Arroyo et al. (2004)) which was retained*

Saydah S, Brancati F, Golden S, Fradkin J, Harris M: Depressive symptoms and the risk of type 2 diabetes mellitus in a US sample. *Diabetes Metab Res Rev* 19:202-208, 2003.

*Utilized study populations that had been specifically selected for the presence of depression or diabetes risk factors (the effect of excluding these reports was investigated in the Sensitivity Analysis portion of Results).*

Miller E, Leslie D, Rosenheck R: Incidence of new-onset diabetes mellitus among patients receiving atypical neuroleptics in the treatment of mental illness. *J Nerv Ment Dis* 193:387-395, 2005.

Havranek E, Spertus J, Masourdi F, Jones P, Rumsfeld J: Predictors of the onset of depressive symptoms in patients with heart failure. *J Am Coll Cardiol* 44:2333-2338, 2004.
